# Supplementary material
Source: PubMed Central journal article supplement (PMC6234074)

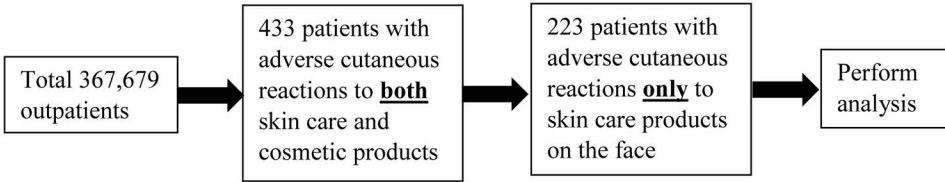

**Figure 1. Flowchart of Patient Enrollment**

Supplement: NIHMS983549-supplement-Supp_figS1.pdf [file NIHMS983549-supplement-Supp_figS1.pdf]
